1 Neutrophils are required during immunization with the pneumococcal conjugate vaccine  
2 for protective antibody responses and host defense against infection

3 Essi Y. I. Tchalla, Elizabeth A. Wohlfert and Elsa N. Bou Ghanem<sup>1,2,3</sup>

4 Author affiliations: Department of Microbiology and Immunology, University at Buffalo

5 School of Medicine, Buffalo, NY 14203, USA

6 Running title: PMNs induce antibodies post vaccination

7 Address correspondence to: Elsa N. Bou Ghanem, 955 Main Street, Buffalo, NY, 14203.

8 Telephone: 716-829-2422. Email: [elsaboug@buffalo.edu](mailto:elsaboug@buffalo.edu)

9 Word counts: Abstract 150; Manuscript 3,499

10

11

12

13

14

15

<sup>1</sup> The authors declare no conflict of interest

<sup>2</sup> Grant support: This work is in part supported by National Institute of Health grant R00AG051784 to ENBG.

<sup>3</sup> Address correspondence and reprint requests to: Elsa N. Bou Ghanem, 955 Main Street, Buffalo, NY, 14203. Telephone: 716-829-2422. Email: [elsaboug@buffalo.edu](mailto:elsaboug@buffalo.edu)

16 **Abstract**

17 Neutrophils can shape adaptive immunity, however their role in vaccine-induced  
18 protection against infections *in vivo* remains unclear. Here, we tested their role in the  
19 clinically relevant polysaccharide conjugate vaccine against *Streptococcus pneumoniae*  
20 (pneumococcus). We antibody depleted neutrophils during vaccination, allowed them to  
21 recover, and four weeks later challenged mice with pneumococci. We found that while  
22 isotype-treated vaccinated controls were protected against an otherwise lethal infection in  
23 naïve mice, full protection was lost upon neutrophil depletion. Compared to vaccinated  
24 controls, neutrophil-depleted mice had higher lung bacterial burdens, increased incidence  
25 of bacteremia and lower survival rates. Sera from neutrophil-depleted mice had less anti-  
26 pneumococcal IgG2c and IgG3, were less efficient at inducing opsonophagocytic killing  
27 of bacteria by neutrophils *in vitro* and worse at protecting naïve mice against pneumococcal  
28 pneumonia. In summary, neutrophils are required during vaccination for optimal host  
29 protection, which has important implications for future vaccine design against  
30 pneumococci and other pathogens.

31

32 **Key words:** Neutrophils, antibodies, vaccines, *Streptococcus pneumoniae*

33

34

35

36

37

38

## 39 **Introduction**

40 *S. pneumoniae* are Gram-positive bacteria with >90 serotypes based on capsular  
41 polysaccharides [1]. These bacteria can cause pneumonia, meningitis and bacteremia [2]  
42 and remain a serious cause of mortality and morbidity worldwide, particularly in the  
43 elderly [3]. Currently, two vaccines covering common disease-causing bacterial  
44 serotypes, are available [4]. The pneumococcal polysaccharide vaccine (PPSV) consists  
45 of polysaccharides that directly cross-link B cell receptors on mature B cells leading to  
46 antibody (Ab) production independent of T cells [5]. PPSV is routinely recommended for  
47 elderly individuals >65 years old and adults with medical conditions [6]. As children <2  
48 years old lack mature B cells, they fail to produce T-independent Abs [7]. Therefore, the  
49 pneumococcal conjugate vaccine (PCV), was introduced for use in children. PCV  
50 contains polysaccharides linked to a carrier protein that triggers a T-dependent Ab  
51 response [4]. PCV has had great efficacy in children and is currently recommended for  
52 use in immunocompromised adults and elderly individuals with underlying conditions  
53 [6]. As PCV is recommended for adults with compromised immunity including B and T  
54 cell responses [4], it is important to elucidate novel players in vaccines that could be  
55 potential targets to boost protection.

56 Abs against capsular polysaccharides following vaccination bind to *S.*  
57 *pneumoniae* and protect the host against infection [4]. The functionality of Abs is  
58 determined by their antigen affinity. Affinity to antigens is mediated via the variable  
59 regions which make up the Fab or antigen binding portions and is optimized by somatic  
60 hypermutation (SHM) [8]. The Fc or constant region of Ab, which determines their class,  
61 also shapes their function, with the different classes of Abs having distinct immune

62 modulating activities [8]. Abs against T-independent antigens such as bacterial  
63 polysaccharides are typically produced by marginal zone B cells in the spleen [9]. In  
64 contrast, T cell-dependent Ab production occurs in germinal centers, where a specialized  
65 subset of CD4<sup>+</sup> T-follicular helper cells (TFH) [10] induce B cells to undergo class-  
66 switch recombination and SHM resulting in Abs with improved function [11]. PCV  
67 significantly boosts class switching to IgG as compared to PPSV [12] and further induces  
68 TFH cells which correlate with enhanced Ab function [13].

69 Polymorphonuclear leukocytes (PMNs) or neutrophils, play a crucial role in  
70 innate immunity to infections [14]. It is now appreciated that PMNs can also regulate  
71 adaptive immunity. PMNs can directly induce Ab production by B cells [11]. In the  
72 spleen, a subset of PMNs termed B helper neutrophils was described to produce APRIL,  
73 BAFF and IL-21 [9] that triggered Ab production by marginal-zone B cells [9, 15]. This  
74 was described for T-independent antigens including bacterial polysaccharides [9]. PMNs  
75 may also affect T cell dependent Ab responses [15], however, that is less established.  
76 PMNs are thought to both activate and suppress T cells [16]. PMNs produce a repertoire  
77 of chemokines that recruit T-cells and also produce cytokines that drive T-cell subset  
78 differentiation [16]. PMN-derived products can prime T cells to more efficiently respond  
79 to antigens [17]. PMNs also activate T cells via recruiting and activating antigen  
80 presenting cells [18] or acting as antigen presenting cells themselves [16, 19-23]. In  
81 contrast, PMNs produce compounds that inhibit T cell activation [24] including ROS  
82 [25], arginase-1 [26] and serine proteases [27]. Therefore, it is unclear whether upon *in*  
83 *vivo* vaccination, if PMNs would suppress or induce T-dependent Ab responses. Further,  
84 although there have been elegant studies characterizing mechanisms of PMN interactions

85 with B and T cells, most of the work has been done either *in vitro* or *in vivo* using model  
86 antigens [11, 18, 24]. Thus, studies examining the role of PMNs in clinically relevant  
87 vaccinations and how that shapes protection against *in vivo* infections are needed.

88 PMNs are required to control bacterial numbers following *S. pneumoniae*  
89 infection [28, 29]. PMNs also play a role in Ab responses against pneumococci. When  
90 compared to healthy controls, patients with neutropenic disorders had lower levels of Abs  
91 to some pneumococcal polysaccharides [9]. In mice, splenic PMNs localized with  
92 marginal zone B cells and were required for production of T-independent Abs during  
93 pneumococcal infection [15, 30]. However, whether PMNs shape responses to the  
94 pneumococcal conjugate vaccine and if they impair or promote Ab production remains  
95 unexplored. Here we tested the role of PMNs in response to PCV and found they were  
96 required at the time of vaccination for optimal Ab responses as well as host protection  
97 against pneumococcal infection. This study highlights the link between PMNs and Ab  
98 responses in the context of a clinically relevant immunization, which has far-reaching  
99 implications for vaccine design against *S. pneumoniae* and other pathogens.

100

## 101 **Methods**

### 102 *Mice*

103 Female C57BL/6 mice (6-8 weeks) were purchased from Jackson Laboratories (Bar  
104 Harbor, ME) and used in all experiments. Mice were housed in a specific-pathogen free  
105 facility at the University at Buffalo and all experiments were conducted in accordance  
106 with Institutional Animal Care and Use Committee (IACUC) guidelines.

### 107 *Bacteria*

108 Wild type (WT) *S. pneumoniae* TIGR4 and capsule-deletion mutant ( $\Delta cps$ ) *S.*  
109 *pneumoniae* were kind gifts from Andrew Camilli. All bacteria were grown to mid-  
110 exponential phase in Todd-Hewitt broth (BD Biosciences) supplemented with Oxyrase  
111 (Oxyrase) and 0.5% yeast extract at 37°C in 5% CO<sub>2</sub>. Aliquots were frozen at -80°C in  
112 growth media with 20% (v/v) glycerol. Prior to use, aliquots were thawed on ice, washed  
113 and diluted in PBS to the desired concentrations. Titers were confirmed by plating on  
114 Tryptic Soy Agar plates supplemented with 5% sheep blood agar (Northeast Laboratory  
115 Services).

### 116 ***Immunization***

117 Mice were immunized via intramuscular (*i.m.*) injection of 50µl of the pneumococcal  
118 conjugate vaccine Prevnar-13® (Wyeth pharmaceuticals) into the caudal thigh muscle.  
119 Sera was collected from all mice prior to immunization, as well as two and four weeks  
120 post immunization and saved at -80°C for subsequent assays.

### 121 ***Neutrophil Depletion***

122 Mice were treated intra-peritoneally (*i.p.*) with 50 µg of the Ly6G-depleting antibody IA8  
123 or isotype IgG control (BioXCell) following the timeline in Fig 1A.

### 124 ***Adoptive Transfer of Sera***

125 Five weeks following immunization, vaccinated, vaccinated PMN-depleted and naïve  
126 mice were euthanized and blood harvested via cardiac puncture. Sera was obtained from  
127 the blood, pooled for each group and transferred *i.p.* (250µl) into naïve recipients.  
128 Recipients were then infected one hour later [31].

### 129 ***Animal Infections***

130 Mice were intra-tracheally (*i.t.*) challenged with 10<sup>7</sup> colony-forming units (CFU) of WT

131 *S. pneumoniae* as previously described [31]. Following infection, one set of mice were  
132 monitored daily over one week for bacteremia as well as clinical signs of disease  
133 including weight loss, activity level, posture and breathing and blindly scored from 0  
134 (healthy) to 21 (severely sick). Twenty-four hours post infection, another set of mice  
135 were euthanized and lung and blood were assessed for CFU.

#### 136 ***Antibody ELISA***

137 Sera Ab levels were measured by ELISA as previously described [31]. Nunc maxisorp®  
138 plates were coated overnight at 4°C with type 4 Pneumococcal Polysaccharide (ATCC®)  
139 at 2µg/well. Plates were washed and blocked for 2 hours. The sera were preabsorbed with  
140 a pneumococcal cell wall polysaccharide mixture (CWP-multi from Cederlane) to  
141 neutralize non-capsular Abs and then added to the plate. After a 3h incubation and  
142 washing, pneumococcal-specific Abs were detected using HRP-conjugated goat anti-  
143 mouse IgM (Invitrogen), IgG (Millipore Sigma), IgG1, IgG2b, IgG2c or, IgG3 (Southern  
144 Biotech) followed by TMB substrate (Thermo Scientific™) and readings at OD<sub>650</sub> using a  
145 BioTek® reader. Kinetic ELISAs were performed with readings every minute for 10  
146 minutes. Ab units were calculated as percentages of a control hyperimmune serum  
147 included in each ELISA. Hyperimmune sera was pooled from mice that were intra-  
148 nasally inoculated with *S. pneumoniae* TIGR4 over four weeks as previously described  
149 [31], immunized with PCV at week 4 and injected i.p. with heat-killed bacteria at week 5.

#### 150 ***Myeloperoxidase (MPO) ELISA***

151 MPO levels were measured in lung homogenates using the Mouse Myeloperoxidase  
152 ELISA kit from Invitrogen™ as per manufacturer's instructions.

#### 153 ***Isolation of PMNs***

154 PMNs were isolated from the bone-marrow using density centrifugation with Histopaque  
155 1119 and Histopaque 1077 (Sigma) as previously described [28]. PMNs were  
156 resuspended in Hanks' Balanced Salt Solution (HBSS without Ca<sub>2+</sub> and Mg<sub>2+</sub>)  
157 supplemented with 0.1% gelatin and used in subsequent experiments. Purity was  
158 confirmed by flowcytometry and the isolated cells were 85-90% Ly6G<sup>+</sup>.

### 159 *Opsonophagocytic Killing Assay (OPH)*

160 The ability of PMNs to kill pneumococci was assessed as previously described [28].  
161 Briefly, 1x10<sup>5</sup> PMNs were infected with 1x10<sup>3</sup> bacteria pre-opsonized with 3% mouse  
162 sera in 100 µl reaction volumes of HBSS/0.1% gelatin (with Ca<sub>2+</sub> and Mg<sub>2+</sub>) and rotated  
163 at 37°C for 40 minutes. The reactions were stopped on ice and plated for CFU. The  
164 percent of bacteria killed was calculated using no PMN controls.

### 165 *Flow Cytometry*

166 One day following the last PMN depletion, mice were euthanized and blood, vaccine  
167 draining popliteal lymph nodes and spleen were harvested. Single-cell suspensions of  
168 splenocytes and lymph nodes were prepared by mashing the organs through sterile mesh  
169 screens using the plunger of a 3-ml syringe. Red blood cells were lysed with a hypotonic  
170 buffer and the cells surface stained for Ly6G (IA8 or RB6, Biolegend), CD11b (M1/70,  
171 Invitrogen), CD11c (N418, BD Bioscience), F4/80 (BM8, BD Bioscience) and Ly6C  
172 (AL-21, BD Bioscience) in the presence of Fc-block (BD Bioscience). Live cells were  
173 identified using a dead cell stain kit (Life Technologies). Fluorescence intensities were  
174 measured on a BD Fortessa and at least 20,000 events were analyzed using FlowJo.

### 175 *Statistical Analysis*



176 All statistical analysis was done using Graphad Prism version 8. Significant differences  
177 were determined by Fisher's exact test, One-way ANOVA followed by Dunnet's test or  
178 Student's t-test as appropriate. Survival analyses were performed using the log-rank  
179 (Mantel-Cox) test.  $p$  values less than 0.05 were considered significant.

180

## 181 **Results**

### 182 **PMNs are required at the time of immunization with PCV for host protection** 183 **against pneumococcal infection**

184 To test if PMNs were required for protection at the time of vaccination with PCV,  
185 we used the anti-Ly6G Ab IA8 to deplete PMNs or isotype controls one day prior to and  
186 every two days throughout the first week following vaccination (timeline- Fig 1A). One  
187 day after the final treatment, we verified depletion in the blood and found ~99% reduction  
188 in the number of circulating PMNs (Fig S1A). As splenic PMNs have a role in Ab  
189 production [9, 15], we also examined PMN numbers in the spleen. We found that upon  
190 vaccination there was a ~2-fold increase in splenic PMNs (Fig S1B) and that treatment  
191 with depleting Abs resulted in ~98% depletion of those cells (Fig S1B). We also verified  
192 that Ab treatment was specific to PMNs and did not result in any changes in the number of  
193 circulating and splenic monocytes, dendritic cells or macrophages (Fig S2).

194 Four weeks following vaccination, we challenged mice i.t. with *S. pneumoniae*  
195 TIGR4 strain. Invasive *S. pneumoniae* infection results in pneumonia primarily, but up to  
196 30% of patients with pneumococcal pneumonia also develop bacteremia and have a worse  
197 prognosis [32]. As *S. pneumoniae* strains can differ considerably [33], we chose the well-  
198 characterized serotype 4 isolate TIGR4, originally isolated from a bacteremic patient, as a

199 model of a highly invasive infection modeling pneumonia that results in bacteremia [34]  
200 and that is covered by PCV. We then monitored the disease course and as expected found  
201 that while all naïve mice rapidly succumbed to infection, 100% of vaccinated mice  
202 survived (Fig 1B). However, unlike vaccinated controls, full protection was lost in PMN-  
203 depleted mice (Fig 1). The majority of PMN-depleted mice displayed severe clinical signs  
204 of disease where 77.8% got sick as compared to only 12.5% of vaccinated controls (Fig  
205 1C). PMN-depleted mice had between 10-100-fold higher pulmonary bacterial numbers  
206 (Fig 2A) and systemic spread (Fig 2B) into the circulation, culminating in significantly  
207 reduced survival (Fig 1B) as compared to vaccinated controls. This reduced protection in  
208 PMN-depleted mice was not due to the continued absence of PMNs at the time of  
209 challenge, as we verified that there was no difference in PMN presence in the lungs as  
210 measured by MPO levels following infection (Fig S1C). Rather, our findings suggest that  
211 PMNs are required at the time of vaccination with PCV for full protection against  
212 subsequent pneumococcal infection.

213

#### 214 **PMNs are required for optimal antibody isotype switching in response to PCV** 215 **immunization**

216 Next, we wanted to explore the mechanisms by which PMNs contributed to  
217 vaccine-induced protection. We first examined Ab production and as expected observed  
218 isotype switching to IgG by week 4 post vaccination in our control group (Fig 3). We  
219 found that PMN depletion did not alter IgM or total IgG levels against capsular  
220 polysaccharide type 4 (Fig 3A and B) or heat-killed *S. pneumoniae* (not shown).  
221 However, when we examined IgG subtypes, we found that depletion of PMNs during

222 vaccination resulted in slightly reduced levels of IgG2b (Fig 4A) and significantly lower  
223 levels of IgG2c (Fig 4B) and IgG3 (Fig 4C) at week 4 post vaccination. Interestingly,  
224 IgG1 levels (Fig 4D) were slightly, but not significantly elevated in PMN depleted group  
225 as compared to vaccinated controls. These data suggest that PMNs play a role in class  
226 switching to certain IgG subtypes.

227

### 228 **PMNs are required for optimal antibody function following PCV immunization**

229       Apart from Ab levels, Ab function is key for vaccine-efficacy [35]. We next  
230 explored if PMNs affected Ab affinity to bacterial surfaces. We tested the ability of IgG  
231 in the sera of the different mouse groups to bind the surface of *S. pneumoniae* by flow  
232 cytometry. Very little IgG bound to bacteria upon incubation with naïve sera. However,  
233 we observed a 30-fold increase in the amount of IgG bound to bacteria when sera from  
234 vaccinated mice were used (Fig 5A). As expected, in immune sera, the bound IgG was  
235 specific to capsular polysaccharides as very little IgG bound to acapsular bacteria ( $\Delta cps$   
236 *S. pneumoniae*). Interestingly, we observed a significant decrease in the amount of IgG  
237 bound to *S. pneumoniae* opsonized with sera from PMN-depleted mice as compared sera  
238 from vaccinated controls (Fig 5A).

239       We next compared the opsonic capacity of Abs by comparing the ability of sera to  
240 induce opsonophagocytic (OPH) killing of *S. pneumoniae* by primary PMNs isolated  
241 from naïve mice. We found sera from vaccinated controls significantly boosted bacterial  
242 killing by PMNs where 60% of the bacterial input were killed by PMNs in the presence  
243 of immune sera as compared to ~10% with naïve sera (Fig 5B). Strikingly, sera from  
244 PMN-depleted mice failed to induce opsonophagocytic killing of *S. pneumoniae* by

245 PMNs where only 3% of the bacterial input was killed (Fig 5B). Abs can also activate the  
246 complement pathway and directly kill bacteria [8] but we detected no differences in the  
247 ability of sera alone from any of the mouse groups to kill pneumococci (Fig S3).

248         Given the difference in the *in vitro* function we observed, we finally tested the  
249 protective activity of Abs generated upon vaccination in the absence of PMNs. Naive  
250 young mice were injected i.p. with five-week sera from either vaccinated controls, naïve  
251 mock-immunized mice or our PMN depleted vaccinated group. Mice were then  
252 challenged i.t. with *S. pneumoniae* TIGR4 one hour following sera transfer. We found  
253 that while all of the mice receiving naïve sera succumbed to infection, all of the mice  
254 receiving sera from vaccinated controls survived the challenge (Fig 5C). In contrast, only  
255 half of the mice receiving sera from the PMN depleted vaccinated group survived (Fig  
256 5C). These data indicate that Abs produced during vaccination in the absence of PMNs  
257 are not sufficient to provide protection against subsequent pneumococcal infection.

258

## 259 **Discussion**

260         Traditionally, PMNs are viewed as effectors of vaccine responses where  
261 vaccination triggers Abs that bind to pathogens and promote their clearance via  
262 enhancing uptake and killing by PMNs [36]. However, the extent to which PMNs  
263 contribute to vaccine mediated protection against infections *in vivo* has not been fully  
264 elucidated. In this study, we explored the role of PMNs in immunization with the  
265 pneumococcal conjugate vaccine. We found that PMNs were needed for production of  
266 functional Abs following vaccination. Importantly, PMNs were required at the time of  
267 immunization for full protection against subsequent invasive pneumococcal infection.

268 Our findings highlight the *in vivo* role of PMNs as inducers of protective vaccine  
269 responses against *S. pneumoniae* infections.

270 The mechanisms by which PMNs mediate Ab production in response to PCV is  
271 unclear. In adults, polysaccharides can directly cross-link B cell receptors and elicit Ab  
272 production independent of T cells [5]. PCV converts this T-independent response to one  
273 that involves T cells as it consists of polysaccharides linked to the carrier protein CRM<sub>197</sub>  
274 [5]. This generates T cells specific to the carrier protein [37, 38]. When B cells recognize  
275 polysaccharides, they are thought to bind and internalize the polysaccharide along with  
276 its protein carrier and then display peptides derived from the carrier on MHC-II. This  
277 allows these polysaccharide-specific B cells to interact with carrier-peptide specific T  
278 cells which in turn help the B cells produce anti-polysaccharide Abs [39]. Therefore, in  
279 the context of PCV, PMNs could either be working on B cells, T cells or both. In  
280 humans, a subset of splenic PMNs directly induce Ab production by marginal zone B  
281 cells in response to T-independent antigens including bacterial polysaccharides [9]. In  
282 mice, splenic B helper PMNs were found to produce pantrexin3, which was important for  
283 IgM production following the immunization with the unconjugated pneumococcal  
284 polysaccharide vaccine [15]. Pantrexin3 was also important for T-cell independent IgM  
285 and IgG production against polysaccharides following intravenous infection with *S.*  
286 *pneumoniae* [15]. The role of PMNs in T-dependent responses is less clear. In mice,  
287 PMNs impaired IgA but not IgG or IgM production in response to vaccination with the  
288 adjuvant *Bacillus anthracis* edema toxin [40]. Mouse PMNs were found to directly  
289 present ovalbumin peptides to CD4<sup>+</sup> T cells triggering T cell cytokine production and  
290 proliferation [20]. However, IgG2 responses to ovalbumin were not impaired in

291 pantrexin3<sup>-/-</sup> mice [15]. In contrast, Abs against influenza PR8 and the T-  
292 dependent antigen TNP-Ficoll required pantrexin3 production by murine PMNs  
293 [15]. Similarly, human PMNs were able to present influenza hemagglutinin to  
294 CD4<sup>+</sup> T cells [22]. In rhesus macaques, PMNs presented HIV-envelope  
295 glycoproteins to CD4<sup>+</sup> T cells [22] and induced Ab production against SIV when  
296 co-cultured with B cells [41]. Here, in the context of immunization with PCV,  
297 PMNs are clearly required for optimal Ab responses, however whether they are  
298 acting on T cells remains to be determined.

299         A key finding here is that PMNs are required for the production of  
300 functional Abs. The functionality of Abs is determined by the affinity and avidity  
301 to their antigen [8]. Here, although we detected similar levels of IgM and IgG in  
302 sera from PMN-depleted and isotype-treated vaccinated mice, the ability of IgG to  
303 bind pneumococci significantly decreased when they were generated in the  
304 absence of PMNs. This suggests that Ab affinity is increased in the presence of  
305 PMNs. Ab affinity is improved by SHM of the Fab variable regions and typically  
306 occurs in germinal centers and requires T cells [42], although human splenic B  
307 helper PMNs may contribute to SHM in marginal zone B cells [9].

308         Ab function is also influenced by their subclass which is determined by  
309 their Fc region [8]. The Fc portion of Abs shape effector function since they  
310 determine binding to Fc receptors on PMNs as well as the ability to activate  
311 complement [8]. Here, PMNs were required for class switching to IgG2c and  
312 IgG3 but not IgG1 subtypes. The IgG subtype produced in response to PCV  
313 varies in humans based on age, with IgG2 being the predominant response in

314 adults [12, 43]. We found that PMNs were crucial for the ability of Abs to elicit  
315 opsonophagocytic killing of bacteria by primary immune cells. This is in line with  
316 data from humans where although the opsonophagocytic activity of IgG subtypes vary  
317 based on bacterial serotype, IgG2 was reported to have the highest activity while IgG1  
318 had the lowest activity against serotype 4 pneumococci [44]. We also found that PMNs  
319 were required for production of Abs that protect against infection. This could be mediated  
320 by IgG2 [44] or IgG3 which was shown to be protective in mice against pneumococcal  
321 infection [45].

322         How PMNs are inducing class-switching to IgG2c and IgG3 but not IgG1 in  
323 response to PCV is unclear. Efficient class switching from IgM to IgG requires T cell  
324 help [39]. In adults, PCV significantly boosts class switching to IgG as compared to the  
325 unconjugated polysaccharide vaccine [12]. Cytokines produced by T cells further  
326 determine the subtype of IgG produced with IL-17 and IFN- $\gamma$  enhancing switching to  
327 IgG3 and IgG2 more than IgG1 [46, 47]. As PMNs can both produce cytokines [16] and  
328 drive Th1 and Th17 cell differentiation [20], they may contribute to isotype switching by  
329 producing IFN- $\gamma$  or IL-17 themselves or eliciting T cells to do so.

330         In summary, we demonstrate here that PMNs are required at the time of  
331 immunization with the pneumococcal conjugate vaccine for optimal protective Ab  
332 responses and host protection against subsequent *S. pneumoniae* infection. As serotype  
333 replacement by bacterial strains not covered by the current vaccines continue to emerge,  
334 novel serotype-independent vaccine formulations such as whole cell vaccines or common  
335 pneumococcal protein vaccines are being considered [48]. Therefore, future vaccine  
336 designs should take PMN responses into consideration, particularly in susceptible

337 populations like the elderly [2], where PMN responses are known to be  
338 dysregulated [49].

339 **Author Contributions:** EYIT conducted research, analyzed data and wrote paper. EAW  
340 provided essential reagents and expertise. ENBG designed research, wrote paper and had  
341 responsibility for final content. All authors read and approved the final manuscript.

342

343 **Funding:** This work was in part supported by National Institute of Health grant  
344 R00AG051784 to ENBG.

345

346 **Acknowledgements:** We would like to acknowledge Manmeet Bhalla for critical reading  
347 and discussion of the manuscript.

348

349 **Conflict of Interest:** The authors declare no conflict of interest

350

351 **References:**

352 1. Kadioglu A, Weiser JN, Paton JC, Andrew PW. The role of *Streptococcus pneumoniae*  
353 virulence factors in host respiratory colonization and disease. *Nature reviews*  
354 *Microbiology* **2008**; 6:288-301.

355 2. Chong CP, Street PR. Pneumonia in the elderly: a review of the epidemiology,  
356 pathogenesis, microbiology, and clinical features. *South Med J* **2008**; 101:1141-5; quiz  
357 32, 79.

358 3. Henig O, Kaye KS. Bacterial Pneumonia in Older Adults. *Infectious disease clinics of*  
359 *North America* **2017**; 31:689-713.



- 360 4. Chen WH, Kozlovsky BF, Effros RB, Grubeck-Loebenstien B, Edelman R, Sztejn  
361 MB. Vaccination in the elderly: an immunological perspective. *Trends Immunol* **2009**;  
362 30:351-9.
- 363 5. Adderson EE. Antibody repertoires in infants and adults: effects of T-independent and  
364 T-dependent immunizations. *Springer seminars in immunopathology* **2001**; 23:387-403.
- 365 6. Matanock A LG, Gierke R, Kobayashi M, Leidner A, Pilishvili T. Use of 13-Valent  
366 Pneumococcal Conjugate Vaccine and 23-Valent Pneumococcal Polysaccharide Vaccine  
367 Among Adults Aged  $\geq 65$  Years: Updated Recommendations of the Advisory Committee  
368 on Immunization Practices. *MMWR Morb Mortal Wkly Rep* 2019;68:1069–1075. :  
369 CDC, **2019**.
- 370 7. Laferriere C. The immunogenicity of pneumococcal polysaccharides in infants and  
371 children: a meta-regression. *Vaccine* **2011**; 29:6838-47.
- 372 8. Vidarsson G, Dekkers G, Rispens T. IgG subclasses and allotypes: from structure to  
373 effector functions. *Frontiers in immunology* **2014**; 5:520.
- 374 9. Puga I, Cols M, Barra CM, et al. B cell-helper neutrophils stimulate the diversification  
375 and production of immunoglobulin in the marginal zone of the spleen. *Nature*  
376 *immunology* **2011**; 13:170-80.
- 377 10. Vinuesa CG, Linterman MA, Yu D, MacLennan IC. Follicular Helper T Cells.  
378 *Annual review of immunology* **2016**; 34:335-68.
- 379 11. Cerutti A, Puga I, Magri G. The B cell helper side of neutrophils. *J Leukoc Biol* **2013**;  
380 94:677-82.

- 381 12. Soininen A, Seppala I, Nieminen T, Eskola J, Kayhty H. IgG subclass distribution of  
382 antibodies after vaccination of adults with pneumococcal conjugate vaccines. *Vaccine*  
383 **1999**; 17:1889-97.
- 384 13. Sterrett S, Peng BJ, Burton RL, et al. Peripheral CD4 T follicular cells induced by a  
385 conjugated pneumococcal vaccine correlate with enhanced opsonophagocytic antibody  
386 responses in younger individuals. *Vaccine* **2020**.
- 387 14. Deniset JF, Kubes P. Neutrophil heterogeneity: Bona fide subsets or polarization  
388 states? *J Leukoc Biol* **2018**; 103:829-38.
- 389 15. Chorny A, Casas-Recasens S, Sintes J, et al. The soluble pattern recognition receptor  
390 PTX3 links humoral innate and adaptive immune responses by helping marginal zone B  
391 cells. *The Journal of experimental medicine* **2016**; 213:2167-85.
- 392 16. Kalyan S, Kabelitz D. When neutrophils meet T cells: beginnings of a tumultuous  
393 relationship with underappreciated potential. *European journal of immunology* **2014**;  
394 44:627-33.
- 395 17. Tillack K, Breiden P, Martin R, Sospedra M. T lymphocyte priming by neutrophil  
396 extracellular traps links innate and adaptive immune responses. *J Immunol* **2012**;  
397 188:3150-9.
- 398 18. Mantovani A, Cassatella MA, Costantini C, Jaillon S. Neutrophils in the activation  
399 and regulation of innate and adaptive immunity. *Nature reviews Immunology* **2011**;  
400 11:519-31.
- 401 19. Matsushima H, Geng S, Lu R, et al. Neutrophil differentiation into a unique hybrid  
402 population exhibiting dual phenotype and functionality of neutrophils and dendritic cells.  
403 *Blood* **2013**; 121:1677-89.

- 404 20. Abi Abdallah DS, Egan CE, Butcher BA, Denkers EY. Mouse neutrophils are  
405 professional antigen-presenting cells programmed to instruct Th1 and Th17 T-cell  
406 differentiation. *International immunology* **2011**; 23:317-26.
- 407 21. Calabro S, Tortoli M, Baudner BC, et al. Vaccine adjuvants alum and MF59 induce  
408 rapid recruitment of neutrophils and monocytes that participate in antigen transport to  
409 draining lymph nodes. *Vaccine* **2011**; 29:1812-23.
- 410 22. Vono M, Lin A, Norrby-Teglund A, Koup RA, Liang F, Lore K. Neutrophils acquire  
411 the capacity for antigen presentation to memory CD4(+) T cells in vitro and ex vivo.  
412 *Blood* **2017**; 129:1991-2001.
- 413 23. Beauvillain C, Cunin P, Doni A, et al. CCR7 is involved in the migration of  
414 neutrophils to lymph nodes. *Blood* **2011**; 117:1196-204.
- 415 24. Muller I, Munder M, Kropf P, Hansch GM. Polymorphonuclear neutrophils and T  
416 lymphocytes: strange bedfellows or brothers in arms? *Trends Immunol* **2009**; 30:522-30.
- 417 25. Schmielau J, Finn OJ. Activated granulocytes and granulocyte-derived hydrogen  
418 peroxide are the underlying mechanism of suppression of t-cell function in advanced  
419 cancer patients. *Cancer research* **2001**; 61:4756-60.
- 420 26. Munder M, Schneider H, Luckner C, et al. Suppression of T-cell functions by human  
421 granulocyte arginase. *Blood* **2006**; 108:1627-34.
- 422 27. Bank U, Reinhold D, Schneemilch C, Kunz D, Synowitz HJ, Ansorge S. Selective  
423 proteolytic cleavage of IL-2 receptor and IL-6 receptor ligand binding chains by  
424 neutrophil-derived serine proteases at foci of inflammation. *Journal of interferon &*  
425 *cytokine research : the official journal of the International Society for Interferon and*  
426 *Cytokine Research* **1999**; 19:1277-87.

- 427 28. Bou Ghanem EN, Clark S, Roggensack SE, et al. Extracellular Adenosine Protects  
428 against *Streptococcus pneumoniae* Lung Infection by Regulating Pulmonary Neutrophil  
429 Recruitment. *PLoS pathogens* **2015**; 11:e1005126.
- 430 29. Bhowmick R, Tin Maung NH, Hurley BP, et al. Systemic disease during  
431 *Streptococcus pneumoniae* acute lung infection requires 12-lipoxygenase-dependent  
432 inflammation. *J Immunol* **2013**; 191:5115-23.
- 433 30. Deniset JF, Surewaard BG, Lee WY, Kubes P. Splenic Ly6G(high) mature and  
434 Ly6G(int) immature neutrophils contribute to eradication of *S. pneumoniae*. *The Journal*  
435 *of experimental medicine* **2017**; 214:1333-50.
- 436 31. Bou Ghanem EN, Maung NHT, Siwapornchai N, et al. Nasopharyngeal Exposure to  
437 *Streptococcus pneumoniae* Induces Extended Age-Dependent Protection against  
438 Pulmonary Infection Mediated by Antibodies and CD138(+) Cells. *J Immunol* **2018**;  
439 200:3739-51.
- 440 32. Lin SH, Lai CC, Tan CK, Liao WH, Hsueh PR. Outcomes of hospitalized patients  
441 with bacteraemic and non-bacteraemic community-acquired pneumonia caused by  
442 *Streptococcus pneumoniae*. *Epidemiology and infection* **2011**; 139:1307-16.
- 443 33. Kadioglu A, Andrew PW. Susceptibility and resistance to pneumococcal disease in  
444 mice. *Briefings in functional genomics & proteomics* **2005**; 4:241-7.
- 445 34. Aaberge IS, Eng J, Lemark G, Lovik M. Virulence of *Streptococcus pneumoniae* in  
446 mice: a standardized method for preparation and frozen storage of the experimental  
447 bacterial inoculum. *Microbial pathogenesis* **1995**; 18:141-52.
- 448 35. LaFon DC, Nahm MH. Measuring immune responses to pneumococcal vaccines.  
449 *Journal of immunological methods* **2018**; 461:37-43.

- 450 36. Simell B, Vuorela A, Ekstrom N, et al. Aging reduces the functionality of anti-  
451 pneumococcal antibodies and the killing of *Streptococcus pneumoniae* by neutrophil  
452 phagocytosis. *Vaccine* **2011**; 29:1929-34.
- 453 37. Lai Z, Schreiber JR. Antigen processing of glycoconjugate vaccines; the  
454 polysaccharide portion of the pneumococcal CRM(197) conjugate vaccine co-localizes  
455 with MHC II on the antigen processing cell surface. *Vaccine* **2009**; 27:3137-44.
- 456 38. Wuorimaa T, Kayhty H, Eskola J, Bloigu A, Leroy O, Surcel HM. Activation of cell-  
457 mediated immunity following immunization with pneumococcal conjugate or  
458 polysaccharide vaccine. *Scand J Immunol* **2001**; 53:422-8.
- 459 39. Rappuoli R, De Gregorio E, Costantino P. On the mechanisms of conjugate vaccines.  
460 *Proc Natl Acad Sci U S A* **2019**; 116:14-6.
- 461 40. Jee J, Bonnegarde-Bernard A, Duverger A, et al. Neutrophils negatively regulate  
462 induction of mucosal IgA responses after sublingual immunization. *Mucosal immunology*  
463 **2015**; 8:735-45.
- 464 41. Musich T, Rahman MA, Mohanram V, et al. Neutrophil Vaccination Dynamics and  
465 Their Capacity To Mediate B Cell Help in Rhesus Macaques. *J Immunol* **2018**;  
466 201:2287-302.
- 467 42. Lau AW, Brink R. Selection in the germinal center. *Curr Opin Immunol* **2019**; 63:29-  
468 34.
- 469 43. Lottenbach KR, Mink CM, Barenkamp SJ, Anderson EL, Homan SM, Powers DC.  
470 Age-associated differences in immunoglobulin G1 (IgG1) and IgG2 subclass antibodies  
471 to pneumococcal polysaccharides following vaccination. *Infect Immun* **1999**; 67:4935-8.

- 472 44. Mikolajczyk MG, Concepcion NF, Wang T, et al. Characterization of antibodies to  
473 capsular polysaccharide antigens of Haemophilus influenzae type b and Streptococcus  
474 pneumoniae in human immune globulin intravenous preparations. Clinical and diagnostic  
475 laboratory immunology **2004**; 11:1158-64.
- 476 45. Briles DE, Claflin JL, Schroer K, Forman C. Mouse Igg3 antibodies are highly  
477 protective against infection with Streptococcus pneumoniae. Nature **1981**; 294:88-90.
- 478 46. Mitsdoerffer M, Lee Y, Jager A, et al. Proinflammatory T helper type 17 cells are  
479 effective B-cell helpers. Proc Natl Acad Sci U S A **2010**; 107:14292-7.
- 480 47. Kawano Y, Noma T, Yata J. Regulation of human IgG subclass production by  
481 cytokines. IFN-gamma and IL-6 act antagonistically in the induction of human IgG1 but  
482 additively in the induction of IgG2. J Immunol **1994**; 153:4948-58.
- 483 48. Pichichero ME. Pneumococcal whole-cell and protein-based vaccines: changing the  
484 paradigm. Expert Rev Vaccines **2017**; 16:1181-90.
- 485 49. Boe DM, Boule LA, Kovacs EJ. Innate immune responses in the ageing lung. Clinical  
486 and experimental immunology **2017**; 187:16-25.

487

488

#### 489 **Legends**

490 **Figure 1. PMNs are required at the time of vaccination for PCV-mediated protection**  
491 **against *S. pneumoniae* infection.** C57BL/6 female mice were treated i.p. with PMN  
492 depleting antibodies (IA8) or isotype control at days -1, +1, +4 and +7 with respect to  
493 vaccination following the timeline outlined in panel A. Mice were mock treated (naïve) or  
494 administered 50µl of Prevnar-13 via intramuscular injections to the hind legs (vaccinated).

495 Four weeks following vaccination mice were challenged i.t. with  $1 \times 10^7$  CFU *S.*  
496 *pneumoniae* TIGR4 and monitored for survival over time (B) and clinical signs of disease  
497 (C). (B) Data were pooled from 14 mice/group from three separate experiments and \*  
498 denotes significance calculated by the log-Rank (Mantel-Cox) test. (C) Data were pooled  
499 from three separate experiments with each square representing an individual mouse. The  
500 dashed line indicates the symptomatic score threshold (above one). Fractions indicate the  
501 percent of mice that had a score above 1 and \* denotes significant differences from  
502 vaccinated controls by Fisher's exact test.

503

504 **Figure 2. PMNs are required at the time of PCV vaccination for subsequent control**  
505 **of *S. pneumoniae* burden upon pulmonary challenge.** Naïve (green), Prevnar-13  
506 immunized (black) and PMN depleted Prevnar-13 immunized mice (blue) were challenged  
507 i.t. with  $1 \times 10^7$  CFU *S. pneumoniae* TIGR4 four weeks following vaccination following the  
508 timeline in Fig1A. Bacterial burden in the lungs (A) and blood (B) were also enumerated  
509 24 hours post infection. Data were pooled from three separate experiments with each  
510 square representing an individual mouse. \* denotes significant differences from vaccinated  
511 controls by One-way ANOVA followed by Dunnet's test.

512

513 **Figure 3. Total levels of anti-pneumococcal IgG and IgM remain unchanged in PMN-**  
514 **depleted PCV immunized mice.** Sera were collected from naïve (green lines), Prevnar-  
515 13 immunized (black lines) and PMN depleted Prevnar-13 immunized mice (blue lines)  
516 over time as indicated in Fig 1A. Circulating levels of IgM (A) and total IgG (B) against  
517 purified polysaccharide serotype 4 were then measured by ELISA. Antibody units were

518 calculated based on a hyperimmune standard (see Materials and Methods) included in each  
519 ELISA plate.  $p$  values were determined by student t-test. Asterisks ( $p<0.05$ ) indicate  
520 significant differences with respect to vaccinated mice. Data were pooled from two  
521 separate experiments with  $n=6$  mice per group and presented as means  $\pm$  SD.

522

523 **Figure 4. PMNs contribute to IgG2 and IgG3 production following PCV**  
524 **immunization.** Sera were collected from naïve (green lines), Pevnar-13 immunized (black  
525 lines) and PMN depleted Pevnar-13 immunized mice (blue lines) following the timeline  
526 presented in Fig 1A. (A-D) The levels of the indicated antibodies against purified  
527 polysaccharide serotype 4 were then measured in the sera by ELISA. Antibody units were  
528 calculated based on a hyperimmune standard.  $p$  values were determined by student t-test.  
529 Asterisks ( $p<0.05$ ) indicate significant differences with respect to vaccinated mice. Pooled  
530 data from two separate experiments with  $n=6$  mice per group are presented as means  $\pm$   
531 SD.

532

533 **Figure 5. PMNs are required for optimal antibody function following PCV.** (A-C)  
534 Sera were collected from naïve, Pevnar-13 immunized and PMN depleted immunized  
535 mice four weeks post vaccination following the timeline indicated in Fig 1A. (A) Wild  
536 type (*WT*) or a capsule deletion mutant ( $\Delta cps$ ) *S. pneumoniae* were incubated with the  
537 indicated sera for 30 minutes, washed and stained with fluorescently-labeled anti-mouse  
538 IgG. The amount (mean fluorescent intensity or MFI) of bound Abs was determined by  
539 flow cytometry. Representative data from one of three separate experiments ( $n=3$   
540 biological replicates) are shown where each condition was tested in triplicate ( $n=3$



541 technical replicates) per experiment. (B) The ability of PMNs isolated from naïve mice to  
542 kill pneumococci pre-opsonized with the indicated sera was determined. Percent bacterial  
543 killing was determined with respect to a no PMN control. Data shown are pooled from  
544 three separate experiments (n=3 biological replicates) where each condition was tested in  
545 triplicate (n=3 technical replicates) per experiment. (A-B) Bar graph represent means+/-  
546 SD and asterisks indicate significant differences from vaccinated controls as calculated  
547 by One-way ANOVA followed by Dunnet's test. (C) Naïve C57BL/6 female mice were  
548 injected i.p with 200µl of pooled serum from the indicated mice then challenged i.t. 1  
549 hour later with  $5 \times 10^5$  CFU *S. pneumoniae* TIGR4. Survival was assessed over time. \*,  
550 denotes significance by the log-Rank (Mantel-Cox) test. Data were pooled from 8  
551 mice/group from two separate experiments.

Figure 1.

A.

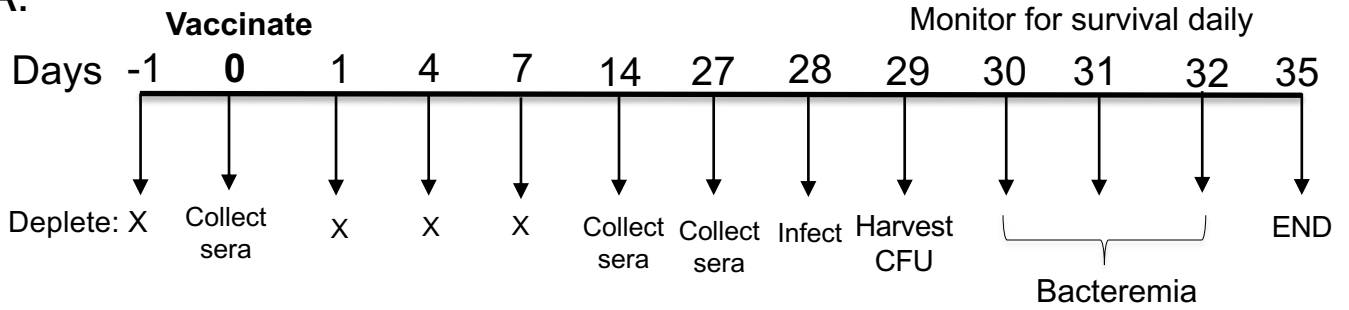

B.

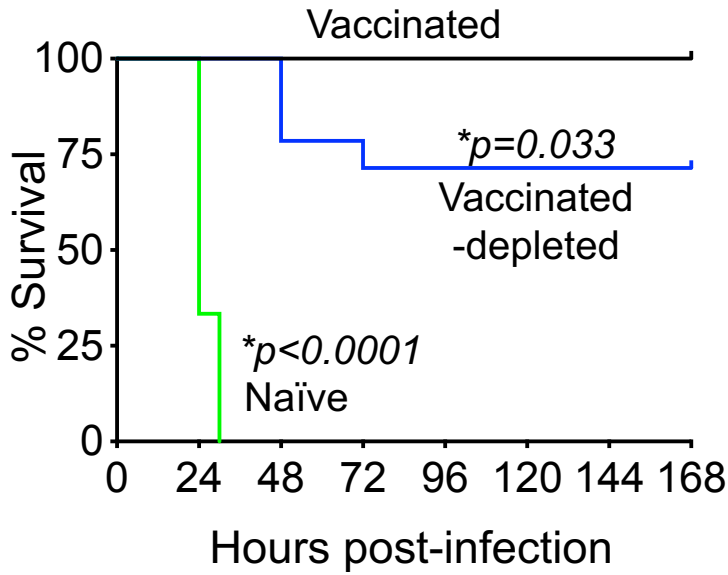

C.

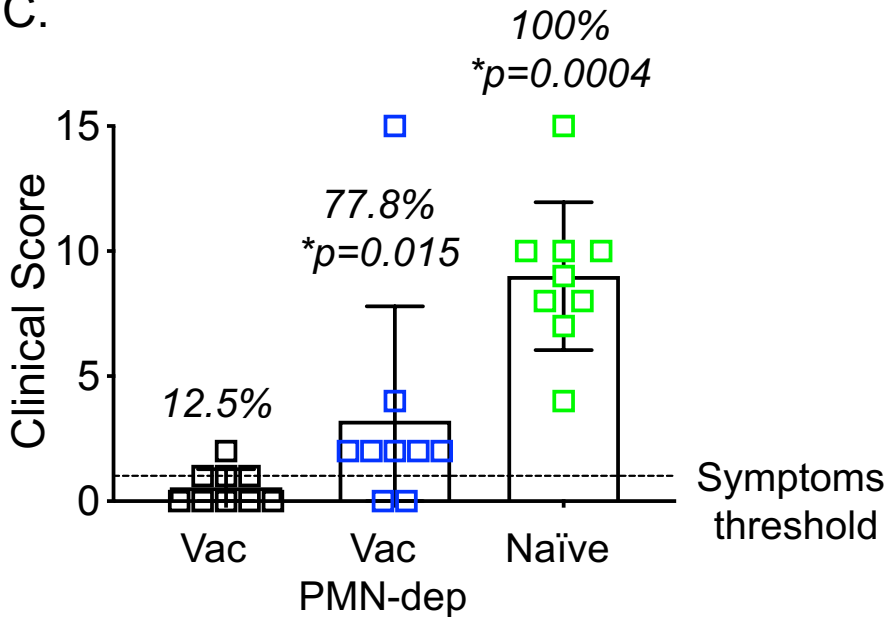

Figure 2.

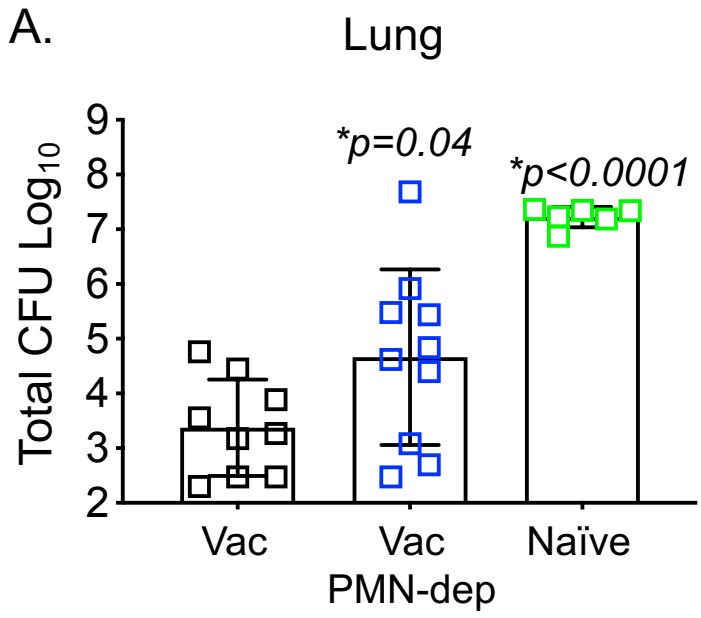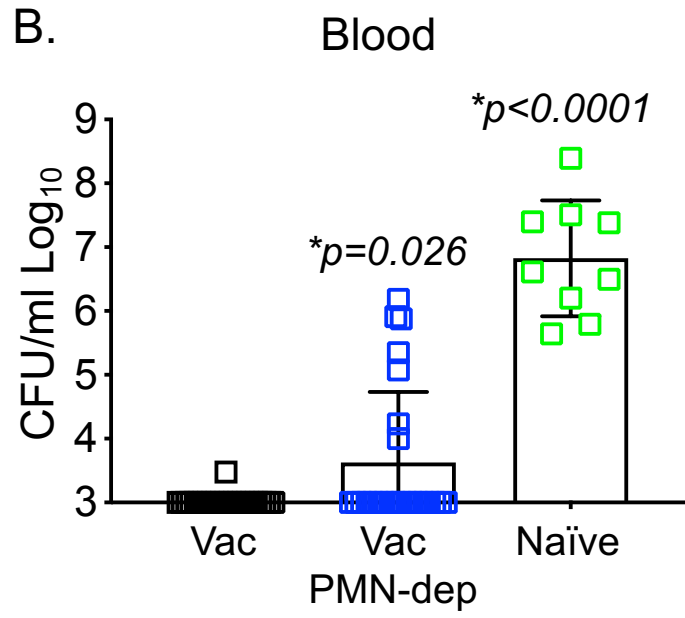

Figure 3.

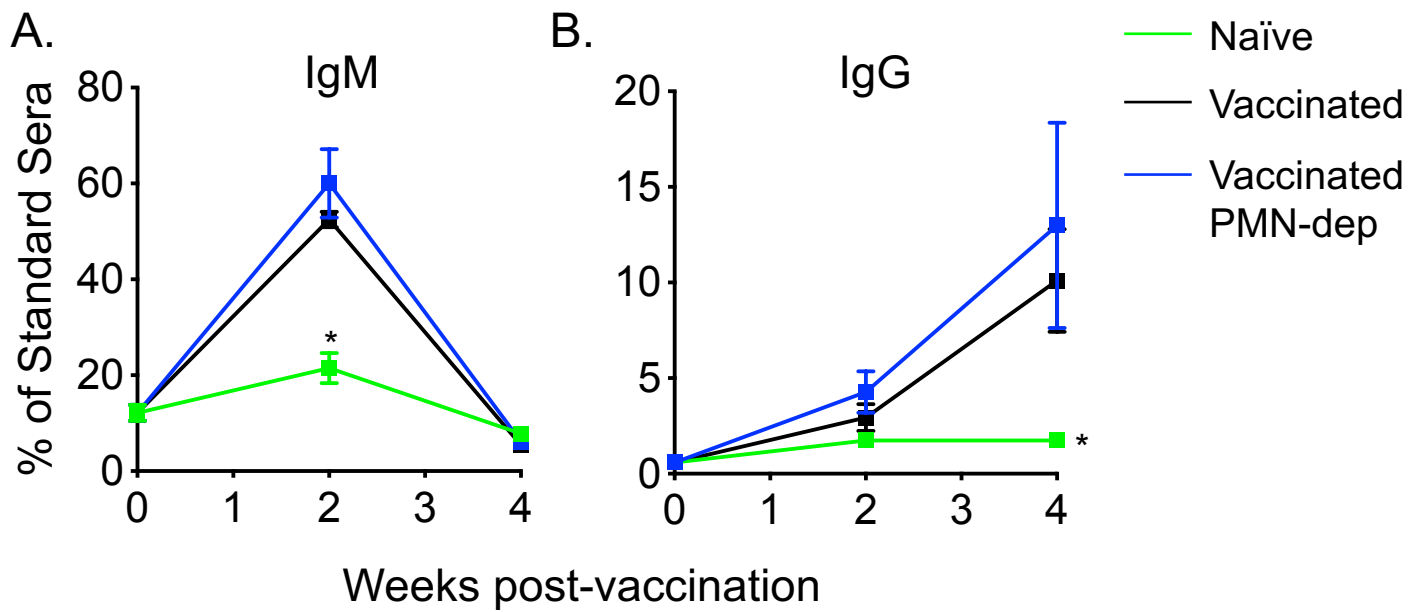

Figure 4.

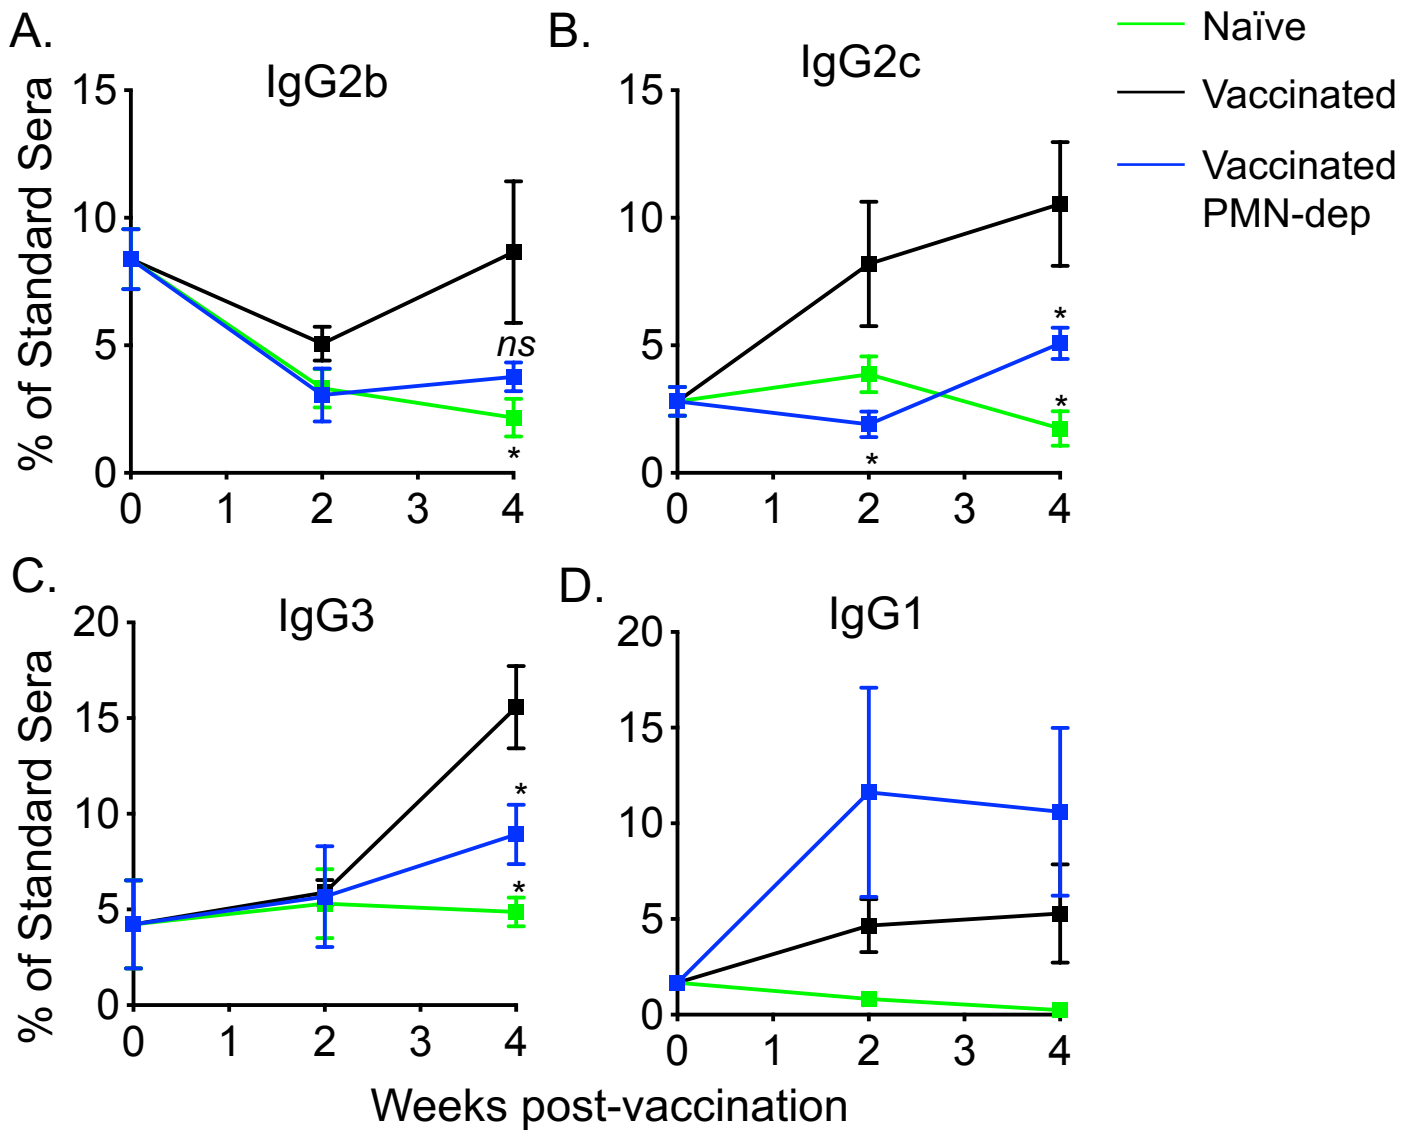

Figure 5.

A.

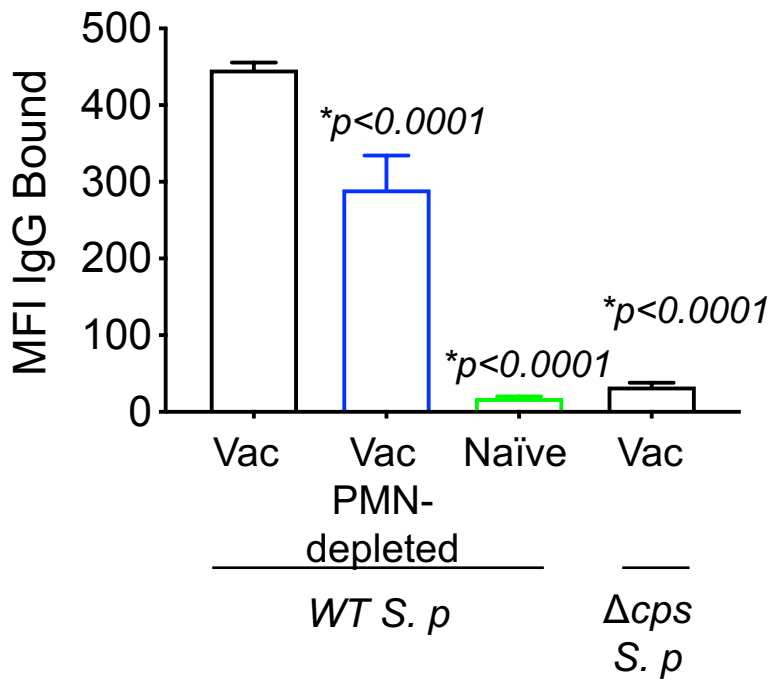

B.

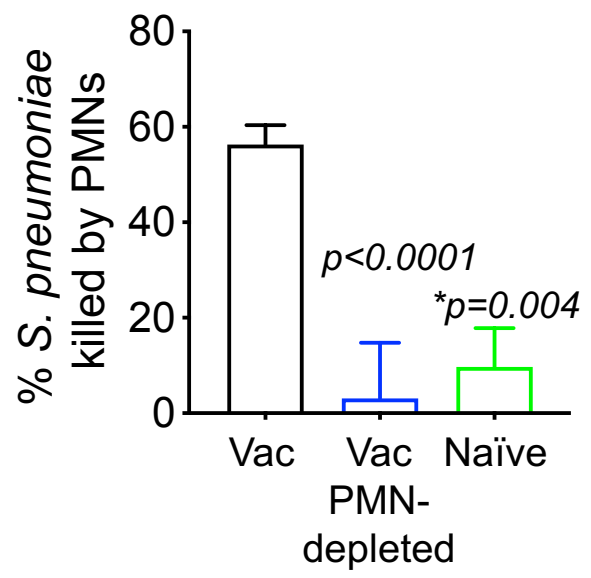

C.

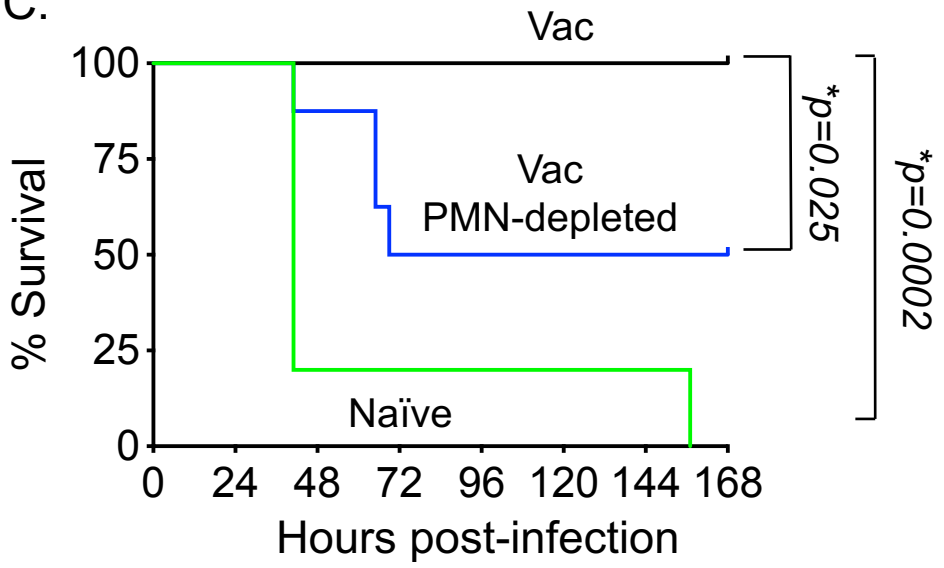

Source: https://www.biorxiv.org/content/10.1101/2020.02.04.934380v1.full.pdf
